# Supplementary material
Source: PubMed Central journal article supplement (PMC5033757)
Supplement: jciinsight-1-88843-s001.pdf [file jciinsight-1-88843-s001.pdf]

Figure S1

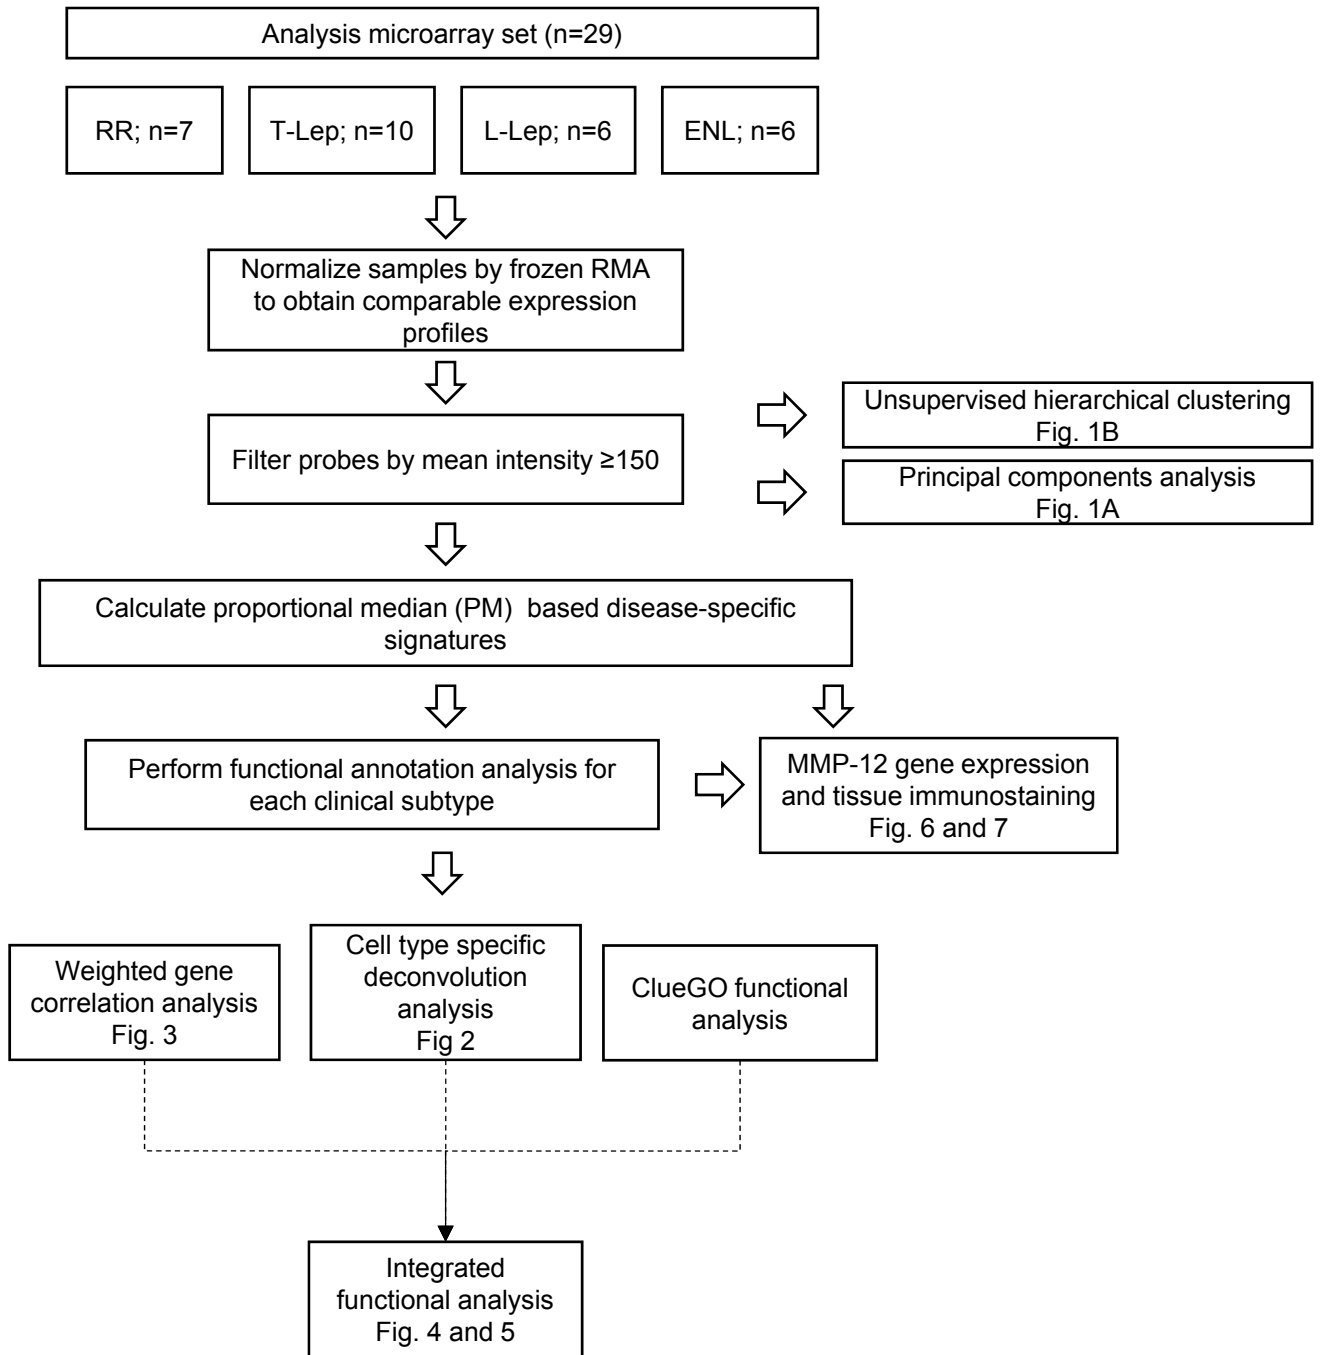





|     |              |                 |      |             |          |      |             |             |      |              |              |      |
|-----|--------------|-----------------|------|-------------|----------|------|-------------|-------------|------|--------------|--------------|------|
| 214 | 229839_at    | SCARA5          | 1.46 | 203167_at   | TIMP2    | 2.41 | 219259_at   | SEMA4A      | 1.30 | 228297_at    | ---          | 3.11 |
| 215 | 228698_at    | SOX7            | 1.46 | 223280_x_at | M54A6A   | 2.41 | 213933_at   | PTGER3      | 1.30 | 219869_s_at  | SLC39A8      | 3.10 |
| 216 | 225698_at    | NCRNA00219      | 1.46 | 223343_at   | M54A7    | 2.40 | 225863_s_at | C19orf12    | 1.30 | 213869_x_at  | THY1         | 3.10 |
| 217 | 238900_at    | HLA-DRB1///HLA- | 1.45 | 214501_s_at | H2AFY    | 2.40 | 205470_s_at | KLK11       | 1.30 | 208549_x_at  | PTMA         | 3.09 |
| 218 | 203797_at    | VSNL1           | 1.45 | 204467_s_at | SNCA     | 2.40 | 219181_at   | LIPG        | 1.30 | 203324_s_at  | CAV2         | 3.09 |
| 219 | 226535_at    | ITGB6           | 1.45 | 201780_s_at | RNF13    | 2.40 | 212875_s_at | C2CD2       | 1.30 | 228487_s_at  | ---          | 3.09 |
| 220 | 209101_at    | CTGF            | 1.45 | 228624_at   | TMEM144  | 2.40 | 226736_at   | CHURC1      | 1.30 | 202458_at    | PRSS23       | 3.07 |
| 221 | 222891_s_at  | BCL11A          | 1.45 | 205801_s_at | RASGRP3  | 2.39 | 226456_at   | RM12        | 1.30 | 223121_s_at  | SFRP2        | 3.06 |
| 222 | 206165_s_at  | CLCA2           | 1.45 | 226867_at   | DENND4C  | 2.39 | 226424_at   | CAP5        | 1.30 | 1564803_at   | KRTP11-1     | 3.04 |
| 223 | 212294_at    | GNG12           | 1.45 | 209380_s_at | ABCC5    | 2.38 | 225226_at   | FAM40A      | 1.30 | 212983_at    | HRAS         | 3.04 |
| 224 | 234994_at    | TMEM200A        | 1.45 | 219666_at   | M54A6A   | 2.38 | 230413_s_at | ---         | 1.30 | 226697_at    | FAM114A1     | 3.03 |
| 225 | 243041_s_at  | ---             | 1.45 | 203651_at   | ZFYVE16  | 2.38 | 212002_at   | C1orf144    | 1.30 | 212848_s_at  | C9orf3       | 3.02 |
| 226 | 221526_x_at  | PARD3           | 1.45 | 209823_x_at | HLA-DQB1 | 2.38 | 214428_x_at | C4A /// C4I | 1.30 | 219936_s_at  | GPR87        | 3.02 |
| 227 | 223217_s_at  | NFKB1           | 1.44 | 202741_at   | PRKACB   | 2.37 | 202180_s_at | MVP         | 1.29 | 218468_s_at  | GREM1        | 3.02 |
| 228 | 220952_s_at  | PLEKHA5         | 1.44 | 213797_at   | RSAD2    | 2.37 | 210839_s_at | ENPP2       | 1.29 | 216449_x_at  | HSP90B1      | 3.02 |
| 229 | 239155_at    | CXADR           | 1.44 | 204430_s_at | SLC2A5   | 2.37 | 209309_at   | AZGP1       | 1.29 | 244107_at    | ---          | 3.02 |
| 230 | 206170_at    | ADR82           | 1.44 | 201739_at   | SGK1     | 2.37 | 200962_at   | RPL31       | 1.29 | 204894_s_at  | AOC3         | 3.02 |
| 231 | 212573_at    | ENDOD1          | 1.44 | 209727_at   | GM2A     | 2.36 | 200860_s_at | CNOT1       | 1.29 | 210423_s_at  | SLC11A1      | 3.01 |
| 232 | 205913_at    | PLIN1           | 1.44 | 209683_at   | FAM49A   | 2.35 | 206884_s_at | SCEL        | 1.29 | 210072_at    | CCL19        | 3.01 |
| 233 | 224799_at    | NDFIP2          | 1.44 | 243882_at   | ---      | 2.35 | 212538_at   | DOCK9       | 1.29 | 227742_at    | CLIC6        | 3.01 |
| 234 | 204731_at    | TGFBR3          | 1.44 | 222881_at   | HPSE     | 2.35 | 217187_at   | MUC5AC      | 1.29 | 230333_at    | ---          | 3.01 |
| 235 | 234989_at    | ---             | 1.44 | 223423_at   | GPR160   | 2.34 | 229839_at   | SCARA5      | 1.29 | 204510_at    | CDC7         | 3.00 |
| 236 | 204712_at    | WIF1            | 1.44 | 242625_at   | RSAD2    | 2.34 | 231906_at   | HOXD8       | 1.29 | 1558924_s_at | CLIP1        | 3.00 |
| 237 | 1552354_at   | C19orf26        | 1.44 | 214669_x_at | IGKC     | 2.34 | 230161_at   | ---         | 1.29 | 225541_at    | RPL22L1      | 3.00 |
| 238 | 209309_at    | AZGP1           | 1.44 | 212314_at   | SEL1L3   | 2.34 | 217767_at   | C3          | 1.29 | 206932_at    | CH25H        | 2.99 |
| 239 | 217087_at    | C1orf68         | 1.44 | 200832_s_at | SCD      | 2.33 | 209121_x_at | NR2F2       | 1.28 | 210128_x_at  | LTBR4R       | 2.99 |
| 240 | 200644_at    | MARCKSL1        | 1.44 | 204440_at   | CD83     | 2.33 | 205987_at   | CD1C        | 1.28 | 205623_at    | ALDH3A1      | 2.97 |
| 241 | 218898_at    | FAM57A          | 1.44 | 217552_x_at | CR1      | 2.33 | 230381_at   | C1orf186 /  | 1.28 | 226179_at    | SLC25A37     | 2.97 |
| 242 | 232116_at    | GRHL3           | 1.44 | 213275_x_at | CTSB     | 2.33 | 218847_at   | IGF2BP2     | 1.28 | 228918_at    | LOC100288617 | 2.97 |
| 243 | 209612_s_at  | ADH1B           | 1.44 | 210757_x_at | DAB2     | 2.33 | 226047_at   | MRV1        | 1.28 | 226930_at    | FNDC1        | 2.96 |
| 244 | 212236_x_at  | KRT17           | 1.43 | 201272_at   | AKR1B1   | 2.32 | 205236_x_at | SOD3        | 1.28 | 242405_at    | ---          | 2.96 |
| 245 | 1565484_x_at | EGFR            | 1.43 | 1559776_at  | ---      | 2.32 | 206296_x_at | MAP4K1      | 1.28 | 210029_at    | IDO1         | 2.95 |
| 246 | 203881_s_at  | DMD             | 1.43 | 203932_at   | HLA-DMB  | 2.32 | 207165_at   | HMMR        | 1.28 | 229228_at    | CREB5        | 2.94 |
| 247 | 238028_at    | C6orf132        | 1.43 | 221530_s_at | BHLHE41  | 2.32 | 218645_at   | ZNF277      | 1.28 | 212481_s_at  | TPM4         | 2.94 |
| 248 | 224008_s_at  | KCNK7           | 1.43 | 212737_at   | GM2A     | 2.32 | 205529_s_at | RUNX1T1     | 1.28 | 200974_at    | ACTA2        | 2.94 |
| 249 | 238654_at    | VSIG10L         | 1.43 | 220061_at   | ACSM5    | 2.30 | 226022_at   | SASH1       | 1.28 | 231771_at    | GJB6         | 2.94 |
| 250 | 211796_s_at  | TRBC1///TRBC2   | 1.43 | 201280_s_at | DAB2     | 2.30 | 231513_at   | ---         | 1.28 | 203510_at    | MET          | 2.94 |
